# Supplementary material for: The relevance of knowledge, perception, and factors that influence contraceptive use among married women living in Uaddara Barracks, Ghana
Source: Frontiers journal article supplement (doi:10.3389/fgwh.2023.1110024), 2023-08-15
Supplement: Data_Sheet_1.PDF [file Data_Sheet_1.PDF]

# **The Relevance of Knowledge, Perception, and Factors that influence Contraceptive Use Among Married Women Living in Uaddara Barracks, Ghana.**

**Daisy Afra Lumor<sup>1\*</sup>, Christian Obirikorang<sup>2</sup>, Emmanuel Acheampong<sup>2,3,4</sup>, Yaa Obirikorang<sup>5</sup>, Hubert Owusu<sup>2</sup>, Sam Newton<sup>6</sup>**

<sup>1</sup> Department of Midwifery, St. Patrick's Nursing and Midwifery Training School, Offinso, Ghana

<sup>2</sup> Department of Molecular Medicine, School of Medicine and Dentistry, Kwame Nkrumah University of Science and Technology, Kumasi, Ghana

<sup>3</sup> Department of Genetic and Genome Biology, University of Leicester, Leicester United Kingdom

<sup>4</sup> Centre for Precision Health, School of Medical and Health Sciences, Edith Cowan University, Joondalup, WA, Australia

<sup>5</sup> Department of Nursing, Garden City University College, Kumasi, Ghana

<sup>6</sup> Department of Global and International Health, School of Public Health, Kwame Nkrumah University of Science and Technology, Kumasi, Ghana

**Table S1: Contraceptive use among participants**

| Statement                                                                     | n (%)      |
|-------------------------------------------------------------------------------|------------|
| <b>What type of Contraceptive have you ever used? (N=286)</b>                 |            |
| Injection                                                                     | 96(33.6)   |
| Pills                                                                         | 114(39.8)  |
| Condoms                                                                       | 89(31.1)   |
| Periodic abstinence/ fertility awareness                                      | 31(10.8)   |
| Intrauterine Device (IUD)                                                     | 4(1.4)     |
| Implants                                                                      | 4(1.4)     |
| Withdrawal                                                                    | 31(10.8)   |
| Spermicide                                                                    | 2(0.7)     |
| Tubal ligation                                                                | 2(0.7)     |
| <b>What type of contraception method are you currently using? (N=180)</b>     |            |
| Injection                                                                     | 48 (26.7)  |
| Pills                                                                         | 44 (24.4)  |
| Condoms                                                                       | 36 (20.0)  |
| Periodic abstinence/ fertility awareness                                      | 37 (20.6)  |
| Intrauterine Device (IUD)                                                     | 14 (7.8)   |
| Implants                                                                      | 6 (3.3)    |
| Withdrawal                                                                    | 15 (8.3)   |
| Tubal ligation                                                                | 2(1.1)     |
| <b>If currently using contraceptives, was it your opinion? (N= 186)</b>       |            |
| Yes                                                                           | 150 (80.6) |
| <b>Experience of side effects of family planning method after application</b> |            |
| Never                                                                         | 180 (51.4) |
| Seldom                                                                        | 102 (29.2) |
| Often                                                                         |            |
| <b>Is your husband in support of contraceptive use?</b>                       |            |
| Yes                                                                           | 281 (80.3) |
| <b>Has your husband used the male condom?</b>                                 |            |
| Yes                                                                           | 235 (67.9) |

**Table S2: Awareness and knowledge of contraceptive use among the study participants**

| <b>Statement</b>                                                  | <b>n (%)</b> |
|-------------------------------------------------------------------|--------------|
| <b>Have you ever heard of contraceptives?</b>                     |              |
| Yes                                                               | 341(97.4)    |
| <b>How did you hear about contraceptive methods? (N=341)</b>      |              |
| From friends/relatives                                            | 209(61.3)    |
| From the media/internet                                           | 220(64.5)    |
| From a doctor                                                     | 115(33.7)    |
| From a midwife                                                    | 190(55.7)    |
| From health talk programs                                         | 66(19.4)     |
| <b>What modern contraceptive method do you know? (N=341)</b>      |              |
| Injection                                                         | 241(70.7)    |
| Pills                                                             | 186(54.5)    |
| Condoms                                                           | 254(74.5)    |
| Sterilization                                                     | 112(32.8)    |
| Intrauterine Device (IUD)                                         | 152(44.6)    |
| Implants                                                          | 146(42.8)    |
| Tubal ligation                                                    | 113(33.1)    |
| Diaphragm                                                         | 77(22.6)     |
| <b>What traditional contraceptive method do you know? (N=341)</b> |              |
| None                                                              | 18(5.3)      |
| Withdrawal                                                        | 179(52.5)    |
| Periodic abstinence                                               | 44(12.9)     |
| Lactational Amenorrhea Method                                     | 31(9.1)      |
| Two methods only                                                  | 35(10.3)     |
| All methods                                                       | 34(10.0)     |
| <b>Do you know the source of contraceptives?</b>                  |              |
| Yes                                                               | 220(64.5)    |
| <b>If yes, where? (N=220)</b>                                     |              |
| Pharmacy                                                          | 97(44.0)     |
| Community Based Outreaches                                        | 16(7.3)      |
| Midwife                                                           | 21(9.5)      |
| Family Planning Unit                                              | 124(56.4)    |

**Table S3: Study participants' perception about contraceptive use**

| <b>Statement</b>                                                              | <b>Don't know<br/>n (%)</b> | <b>Agree<br/>n (%)</b> | <b>Disagree<br/>n (%)</b> |
|-------------------------------------------------------------------------------|-----------------------------|------------------------|---------------------------|
| <b>1. Modern contraceptives services and commodities are inaccessible</b>     | 50 (14.3)                   | 56 (16.0)              | 244 (69.7)                |
| <b>2. It's not easy to discuss sexual issues with partner</b>                 | 19 (5.4)                    | 114 (32.6)             | 217 (62.0)                |
| <b>3. Couple counseling can improve male involvement in contraceptive use</b> | 21 (6.0)                    | 248 (70.9)             | 81 (23.1)                 |
| <b>4. Contraceptives are for females only</b>                                 | 6 (1.7)                     | 42 (12.0)              | 302 (86.3)                |
| <b>5. Contraceptives are acceptable in the barracks community</b>             | 75 (21.4)                   | 223 (63.7)             | 52 (14.9)                 |
| <b>6. Contraceptives benefit males too</b>                                    | 20 (5.7)                    | 293 (83.7)             | 37 (10.6)                 |
| <b>7. Contraceptives is not for the poor</b>                                  | 17 (4.9)                    | 154 (44.0)             | 179 (51.1)                |
| <b>8. It is wrong to use contraceptives</b>                                   | 30 (8.6)                    | 30 (8.6)               | 290 (82.9)                |

**Table S4: Married life of study participants**

| <b>Variable</b>                       | <b>Frequency (n=350)</b> | <b>Percentage (%)</b> |
|---------------------------------------|--------------------------|-----------------------|
| <b>Length of married life (years)</b> |                          |                       |
| 1-5                                   | 141                      | 40.3                  |
| 6-10                                  | 120                      | 34.3                  |
| 11-15                                 | 58                       | 16.6                  |
| >15                                   | 31                       | 8.9                   |
| <b>Number of children</b>             |                          |                       |
| None                                  | 20                       | 5.7                   |
| 1-2                                   | 159                      | 45.4                  |
| 3-4                                   | 132                      | 37.7                  |
| 5-6                                   | 33                       | 9.4                   |
| >6                                    | 6                        | 1.7                   |
| <b>Number of children alive</b>       |                          |                       |
| Not applicable                        | 20                       | 5.7                   |
| 1-2                                   | 159                      | 45.4                  |
| 3-4                                   | 143                      | 40.9                  |
| 5-6                                   | 21                       | 6.0                   |
| 7-8                                   | 6                        | 1.7                   |
| <b>Number of children wanted</b>      |                          |                       |
| 1-2                                   | 63                       | 18.0                  |
| 3-4                                   | 242                      | 69.1                  |
| 5-6                                   | 27                       | 7.7                   |
| 7-8                                   | 18                       | 5.1                   |
| <b>Desire for a male child</b>        |                          |                       |
| No                                    | 71                       | 20.3                  |
| Yes                                   | 167                      | 47.7                  |
| Don't mind gender                     | 112                      | 32.0                  |
| <b>Desire for a female child</b>      |                          |                       |
| No                                    | 95                       | 27.1                  |
| Yes                                   | 143                      | 40.9                  |
| Don't mind gender                     | 112                      | 32.0                  |
| <b>Problems in taken decisions</b>    |                          |                       |
| No                                    | 214                      | 61.1                  |
| Yes                                   | 136                      | 38.9                  |
